# Supplementary material for: Reduction of the Renal Radioactivity of 111In-DOTA-Labeled Antibody Fragments with a Linkage Cleaved by the Renal Brush Border Membrane Enzymes
Source: PubMed Central journal article supplement — J Med Chem. 2023 Jun 16;66(13):8600–13. doi: 10.1021/acs.jmedchem.3c00258 (PMC10350918; doi:10.1021/acs.jmedchem.3c00258), 2023-06-16
Supplement: jm3c00258_si_001.pdf [file jm3c00258_si_001.pdf]

## SUPPORTING INFORMATION

### **Reduction of renal radioactivity of $^{111}\text{In}$ -DOTA-labeled antibody fragments with a linkage cleaved by the renal brush border membrane enzymes**

Hiroyuki Suzuki,\* Mari Araki, Kouki Tatsugi, Kento Ichinohe, Tomoya Uehara, and Yasushi Arano

Laboratory of Molecular Imaging and Radiotherapy, Graduate School of Pharmaceutical Sciences,  
Chiba University, 1-8-1 Inohana, Chuo-ku, Chiba 260-8675, Japan

Corresponding author

\*Hiroyuki Suzuki

Laboratory of Molecular Imaging and Radiotherapy, Graduate School of Pharmaceutical Sciences,

Chiba University,

1-8-1 Inohana, Chuo-ku, Chiba 260-8675, Japan.

Phone: +81-43-226-2898

Fax: +81-43-226-2898

E-mail: [h.suzuki@chiba-u.jp](mailto:h.suzuki@chiba-u.jp)

## Table of Contents

### Methods

#### Syntheses

Synthesis of DO3A*i*Bu-Bn-FG S4

Synthesis of DOTA-Bn-SCN-K S5

Synthesis of non-radioactive In-labeled compounds S5

References S7

### Supplementary Tables

Plasma stabilities of <sup>111</sup>In-labeled Fabs S8

Biodistribution of [<sup>111</sup>In]In-DO3A*i*Bu-Bn-FGK-Fab in normal mice S9

Biodistribution of [<sup>111</sup>In]In-DOTA-Bn-FGK-Fab in normal mice S10

Biodistribution of [<sup>111</sup>In]In-DOTA-Bn-SCN-Fab in normal mice S11

Biodistribution in SY tumor-bearing mice S12

Biodistribution of [<sup>111</sup>In]In-DO3A*i*Bu-Bn-F in normal mice S13

Biodistribution of [<sup>111</sup>In]In-DOTA-Bn-F in normal mice S14

### Supplementary Figures

|                                                                                                                  |     |
|------------------------------------------------------------------------------------------------------------------|-----|
| RP-HPLC analyses for purity check of <b>6</b> and the precursors used for radiolabeling reactions                | S15 |
| RP-HPLC and SE-HPLC analyses for purity check of <sup>111</sup> In-labeled compounds.                            | S16 |
| RP-TLC analyses for purity check of <sup>111</sup> In-labeled compounds.                                         | S17 |
| RP-HPLC and RP-TLC analyses of <i>in vitro</i> metabolic studies using <sup>111</sup> In-labeled LMW substrates. | S18 |
| RP-HPLC chromatograms for characterization of <sup>111</sup> In-labeled compounds                                | S19 |
| SE-HPLC chromatograms for characterization of <sup>111</sup> In-labeled Fabs                                     | S20 |
| RP-TLC analyses of the serum samples at 3 h postinjection of <sup>111</sup> In-labeled Fabs                      | S21 |
| <i>In vitro</i> competitive inhibition assay of radiolabeled Fabs                                                | S22 |

## Methods

### Synthesis of DO3*Ai*Bu-Bn-FG

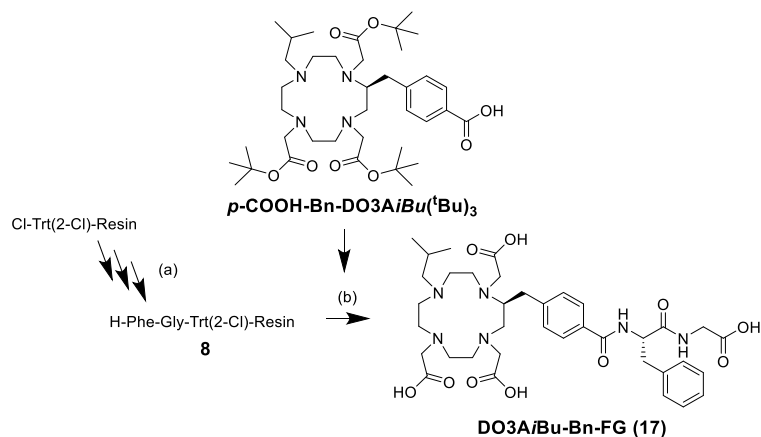

Scheme S1. Synthetic scheme of DO3*Ai*Bu-Bn-FG. Reagents and conditions: (a) 1) Fmoc-amino acids, DIC, HOBT, DMF, rt for 2 h, 2) 20 % piperidine/DMF, rt for 20 min; (b) 1) DIC, HOAt, DMF, rt for 15 h, 2) TFA : triisopropylsilane : water (95/2.5/2.5), rt for 4 h, 19.4%.

### FG-Trt(2-Cl)-Resin (16)

The compound **16** (0.951 mmol/g) was constructed by a conventional Fmoc solid-phase peptide synthesis on Trt(2-Cl)-Resin using *N,N'*-diisopropylcarbodiimide (DIC) and 1-hydroxybenzotriazole·monohydrate in dry DMF.<sup>1</sup>

### DO3*Ai*Bu-Bn-FG (17)

DO3*Ai*Bu-Bn-FG was prepared according to the same procedure as DO3*Ai*Bu-Bn-FGK using **8** (3.48 μmol/3.7 mg) instead of **7**. Purification by analytical RP-HPLC (system A, 21.3 min of retention time) provided DO3*Ai*Bu-Bn-FG as a white solid (0.5 mg, 0.675 μmol, 19.4%). HR-MS(ESI) calcd. for C<sub>37</sub>H<sub>51</sub>N<sub>6</sub>O<sub>10</sub> [M-H]<sup>-</sup>: m/z 739.36667, found: 739.36597. HPLC purity 99.0%, retention time 21.3 min (system A).

### Synthesis of DOTA-Bn-SCN-K

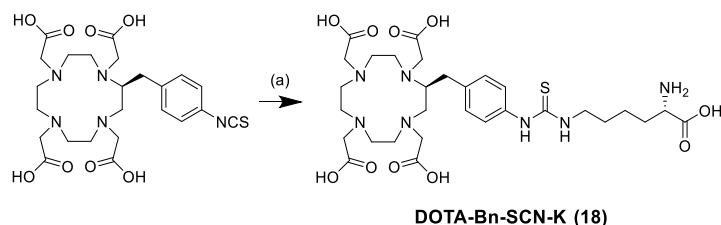

Scheme S2. Synthetic scheme of DOTA-Bn-SCN-K. Reagents and conditions: (a) 1) Boc-Lys-OH, TEA, DMF, rt for 24 h; 2) 10% anisole/TFA, rt for 3 h, 88.7%.

### DOTA-Bn-SCN-K (18)

To a solution of *p*-SCN-Bn-DOTA (5.0 mg, 7.27  $\mu\text{mol}$ ) (Macrocyclics) in DMF (500  $\mu\text{L}$ ) was added TEA and Boc-Lys-OH (1.8 mg, 1 equiv.), and stirred for 24 h at the same temperature. After the solvent was removed *in vacuo*, the residue was dissolved in 10%TFA/anisole (2.0 ml), and stirred for 3 h at room temperature. After the solvent was removed *in vacuo*, diethyl ether (2.0 mL) was added to the residue to give the precipitate. The precipitate was purified by preparative RP-HPLC (system E, 17.5 min of retention time) to provide DOTA-Bn-SCN-K as a white solid (4.5 mg, 6.45  $\mu\text{mol}$ , 88.7%). HR-MS(ESI) calcd. for  $\text{C}_{30}\text{H}_{46}\text{N}_7\text{O}_{10}\text{S}$  [M-H]<sup>-</sup>:  $m/z$  696.30269, found: 696.29821. HPLC purity >99%, retention time 11.2 min (system A).

### Synthesis of non-radioactive In-labeled compounds

A solution of  $\text{InCl}_3 \cdot 4\text{H}_2\text{O}$  in 0.25 M acetate buffer (0.1  $\mu\text{mol}$ , 25  $\mu\text{L}$ ) was added to a solution of each ligand in 0.25 M acetate buffer (0.01  $\mu\text{mol}$ , 25  $\mu\text{L}$ ), and stood for 1 h at room temperature. After the reaction, a solution of 50 mM DTPA in 0.25 M acetate buffer (20  $\mu\text{L}$ ) was added to the mixture, and then analyzed by RP-HPLC.

#### **In-DO3A*i*Bu-Bn-F**

Retention time: 20.7 and 21.6 min (system A), HR-MS(ESI) calcd. for  $\text{C}_{35}\text{H}_{45}\text{InN}_5\text{O}_9$   $[\text{M-H}]^-$ :  $m/z$  794.22561, found: 794.22151 and 794.22304.

#### **In-DOTA-Bn-F**

Retention time: 18.2 and 18.9 min (system A), HR-MS(ESI) calcd. for  $\text{C}_{33}\text{H}_{39}\text{InN}_5\text{O}_{11}$   $[\text{M}]^-$ :  $m/z$  796.16849, found: 796.17065 and 796.16536.

#### **In-DO3A*i*Bu-Bn-FGK(Boc)**

Retention time: 25.7 and 26.1 min (system A), 35.0 and 35.9 min (system C), HR-MS(ESI) calcd. for  $\text{C}_{48}\text{H}_{68}\text{InN}_8\text{O}_{13}$   $[\text{M-H}]^-$ :  $m/z$  1079.39446, found: 1079.39704 and 1079.39037.

#### **In-DOTA-Bn-FGK(Boc)**

Retention time: 23.6 and 24.1 min (system A), 31.2 and 31.9 min (system C), HR-MS(ESI) calcd. for  $\text{C}_{46}\text{H}_{62}\text{InN}_8\text{O}_{15}$   $[\text{M}]^-$ :  $m/z$  1081.33734, found: 1081.33592 and 1081.34083.

#### **In-DO3A*i*Bu-Bn-FG**

Retention time: 19.5 and 20.4 min (system A), HR-MS(ESI) calcd. for  $\text{C}_{37}\text{H}_{48}\text{InN}_6\text{O}_{10}$   $[\text{M-H}]^-$ :  $m/z$  851.24707, found: 851.24821 and 851.24729.

#### **In-DOTA-SCN-K**

Retention time: 10.4 and 10.8 min (system A), 18.4 and 19.0 min (system B), HR-MS(ESI) calcd. for  $C_{30}H_{43}InN_7O_{10}S$

[M]<sup>+</sup>: m/z 808.18309, found: 808.18036 and 808.18318.

## References

- (1) Suzuki, H.; Ichinohe, K.; Araki, M.; Muramatsu, S.; Uehara, T.; Arano, Y. Synthesis and evaluation of a *para*-carboxylated benzyl-DOTA for labeling peptides and polypeptides. *Nucl. Med. Biol.* **2022**, *114-115*, 18-28.

Table S1. The log D values of [<sup>111</sup>In]In-DO3A*i*Bu-Bn-F and [<sup>111</sup>In]In-DOTA-Bn-F.<sup>a</sup>

|                                              | Log D <sub>7.0</sub> | Log D <sub>5.5</sub> |
|----------------------------------------------|----------------------|----------------------|
| [ <sup>111</sup> In]In-DO3A <i>i</i> Bu-Bn-F | -4.31 ± 0.12         | -3.77 ± 0.04         |
| [ <sup>111</sup> In]In-DOTA-Bn-F             | -5.19 ± 0.20         | -4.74 ± 0.47         |

<sup>a</sup>Data represent the mean ± SD (n = 3).

Table S2. Plasma stabilities of <sup>111</sup>In-labeled Fabs.<sup>a</sup>

| Time after incubation (h)                              | 1        | 3        | 6        | 24       |
|--------------------------------------------------------|----------|----------|----------|----------|
| [ <sup>111</sup> In]In-DO3A <i>i</i> Bu-Bn-FGK-Fab (%) | 97.7±0.6 | 97.4±0.8 | 97.3±0.3 | 97.5±0.1 |
| [ <sup>111</sup> In]In-DOTA-Bn-FGK-Fab (%)             | 97.8±0.7 | 98.0±1.3 | 97.9±0.4 | 97.0±0.4 |
| [ <sup>111</sup> In]In-DOTA-Bn-SCN-Fab (%)             | 97.3±0.4 | 97.1±0.1 | 97.2±0.4 | 97.0±0.2 |

<sup>a</sup>Data represent the mean ± SD (n = 3).



Table S3. Biodistribution of radioactivity after intravenous injection of [<sup>111</sup>In]In-DO3A*i*Bu-Bn-FGK-Fab into normal mice.<sup>a</sup>

|                        | 10 min       | 1 h                         | 3 h                         | 6 h                         | 24 h                        |
|------------------------|--------------|-----------------------------|-----------------------------|-----------------------------|-----------------------------|
| Blood                  | 25.29 ± 1.56 | 11.12 ± 1.29                | 4.55 ± 0.21                 | 2.23 ± 0.36                 | 0.13 ± 0.04                 |
| Liver                  | 4.72 ± 0.40  | 3.31 ± 0.35                 | 2.24 ± 0.12                 | 1.87 ± 0.36                 | 0.61 ± 0.06                 |
| Spleen                 | 3.79 ± 0.42  | 2.47 ± 0.12                 | 1.41 ± 0.18                 | 0.89 ± 0.17                 | 0.25 ± 0.08                 |
| Kidney                 | 18.34 ± 1.70 | 16.72 ± 3.59 <sup>c,d</sup> | 13.55 ± 2.15 <sup>c,d</sup> | 10.21 ± 2.60 <sup>c,d</sup> | 2.30 ± 0.57 <sup>c,d</sup>  |
| Pancreas               | 1.05 ± 0.11  | 1.17 ± 0.12                 | 1.40 ± 0.10                 | 1.42 ± 0.18                 | 0.44 ± 0.14                 |
| Heart                  | 4.83 ± 0.32  | 3.66 ± 0.43                 | 2.16 ± 0.23                 | 1.26 ± 0.12                 | 0.27 ± 0.05                 |
| Lung                   | 9.07 ± 2.88  | 5.08 ± 0.99                 | 2.56 ± 0.17                 | 1.57 ± 0.27                 | 0.23 ± 0.08                 |
| Stomach <sup>b</sup>   | 0.38 ± 0.03  | 0.57 ± 0.12                 | 0.60 ± 0.14                 | 0.45 ± 0.10                 | 0.34 ± 0.22                 |
| Intestine <sup>b</sup> | 2.33 ± 0.20  | 4.30 ± 0.17                 | 7.05 ± 0.66                 | 12.75 ± 3.07                | 2.16 ± 0.56                 |
| Muscle                 | 0.76 ± 0.13  | 1.08 ± 0.16                 | 0.78 ± 0.20                 | 0.44 ± 0.07                 | 0.10 ± 0.03                 |
| Bone                   | 2.46 ± 0.81  | 2.08 ± 1.32                 | 0.90 ± 0.13                 | 0.72 ± 0.14                 | 0.24 ± 0.05                 |
| Urine <sup>b</sup>     |              |                             |                             | 47.54 ± 11.75 <sup>c</sup>  | 69.31 ± 3.24 <sup>c,d</sup> |
| Feces <sup>b</sup>     |              |                             |                             | 0.03 ± 0.03                 | 17.92 ± 8.87                |

<sup>a</sup>Data represent the mean of %ID/g ± SD (n = 5).

<sup>b</sup>Data represent the mean of %ID ± SD (n = 5).

<sup>c,d</sup>*P* < 0.05 compared with [<sup>111</sup>In]In-DOTA-Bn-SCN-Fab (<sup>c</sup>) and [<sup>111</sup>In]In-DOTA-Bn-FGK-Fab (<sup>d</sup>). Significances in the kidney and urine were determined by one-way ANOVA followed by Tukey's test.

Table S4. Biodistribution of radioactivity after intravenous injection of [<sup>111</sup>In]In-DOTA-Bn-FGK-Fab into normal mice.<sup>a</sup>

|                        | 10 min       | 1 h                       | 3 h          | 6 h                       | 24 h                      |
|------------------------|--------------|---------------------------|--------------|---------------------------|---------------------------|
| Blood                  | 28.52 ± 1.61 | 13.25 ± 1.15              | 5.49 ± 0.52  | 2.55 ± 0.39               | 0.20 ± 0.03               |
| Liver                  | 5.71 ± 0.96  | 4.83 ± 0.64               | 4.88 ± 0.90  | 4.51 ± 0.89               | 2.99 ± 0.52               |
| Spleen                 | 4.33 ± 0.29  | 4.75 ± 1.03               | 4.35 ± 0.96  | 3.47 ± 0.74               | 2.25 ± 0.38               |
| Kidney                 | 16.10 ± 1.57 | 32.87 ± 4.13 <sup>c</sup> | 43.61 ± 8.29 | 41.54 ± 7.53 <sup>c</sup> | 20.02 ± 3.82 <sup>c</sup> |
| Pancreas               | 0.92 ± 0.17  | 1.26 ± 0.22               | 1.73 ± 0.09  | 1.88 ± 0.28               | 0.97 ± 0.08               |
| Heart                  | 5.28 ± 0.42  | 5.09 ± 0.66               | 3.75 ± 0.58  | 3.30 ± 0.55               | 2.20 ± 0.20               |
| Lung                   | 10.63 ± 1.96 | 6.10 ± 0.92               | 3.57 ± 0.65  | 2.36 ± 0.21               | 0.84 ± 0.08               |
| Stomach <sup>b</sup>   | 0.34 ± 0.10  | 0.61 ± 0.05               | 0.66 ± 0.08  | 0.72 ± 0.14               | 0.36 ± 0.12               |
| Intestine <sup>b</sup> | 2.64 ± 0.30  | 5.08 ± 0.69               | 6.82 ± 0.83  | 9.41 ± 0.47               | 2.98 ± 0.52               |
| Muscle                 | 0.81 ± 0.12  | 1.21 ± 0.25               | 1.04 ± 0.18  | 1.00 ± 0.15               | 0.55 ± 0.11               |
| Bone                   | 3.20 ± 0.73  | 2.31 ± 0.31               | 2.33 ± 0.63  | 2.22 ± 0.42               | 1.76 ± 0.21               |
| Urine <sup>b</sup>     |              |                           |              | 29.64 ± 3.27              | 51.20 ± 7.25              |
| Feces <sup>b</sup>     |              |                           |              | 0.07 ± 0.02               | 12.45 ± 3.74              |

<sup>a</sup>Data represent the mean of %ID/g ± SD (n = 5).

<sup>b</sup>Data represent the mean of %ID ± SD (n = 5).

<sup>c</sup>*P* < 0.05 compared with [<sup>111</sup>In]In-DOTA-Bn-SCN-Fab. Significances in the kidney and urine were determined by one-way ANOVA followed by Tukey's test.

Table S5. Biodistribution of radioactivity after intravenous injection of [<sup>111</sup>In]In-DOTA-Bn-SCN-Fab into normal mice.<sup>a</sup>

|                        | 10 min       | 1 h          | 3 h          | 6 h          | 24 h         |
|------------------------|--------------|--------------|--------------|--------------|--------------|
| Blood                  | 25.65 ± 0.95 | 12.45 ± 0.99 | 4.14 ± 0.44  | 1.88 ± 0.20  | 0.26 ± 0.05  |
| Liver                  | 4.20 ± 0.35  | 3.80 ± 0.47  | 3.32 ± 0.59  | 3.45 ± 0.33  | 3.35 ± 0.77  |
| Spleen                 | 4.16 ± 0.57  | 3.72 ± 0.52  | 3.95 ± 0.75  | 3.43 ± 0.53  | 3.05 ± 0.89  |
| Kidney                 | 18.93 ± 1.77 | 42.23 ± 5.69 | 53.17 ± 6.89 | 51.88 ± 4.68 | 29.08 ± 3.45 |
| Pancreas               | 0.79 ± 0.10  | 1.11 ± 0.12  | 1.62 ± 0.13  | 1.90 ± 0.19  | 1.43 ± 0.51  |
| Heart                  | 5.34 ± 0.71  | 4.81 ± 0.66  | 3.29 ± 0.09  | 2.91 ± 0.33  | 2.56 ± 0.70  |
| Lung                   | 9.43 ± 2.58  | 5.79 ± 0.71  | 3.04 ± 0.38  | 1.95 ± 0.19  | 0.97 ± 0.16  |
| Stomach <sup>b</sup>   | 0.38 ± 0.03  | 0.63 ± 0.07  | 0.60 ± 0.04  | 0.59 ± 0.07  | 0.64 ± 0.19  |
| Intestine <sup>b</sup> | 2.43 ± 0.56  | 4.75 ± 0.49  | 4.32 ± 0.23  | 4.50 ± 0.58  | 6.43 ± 5.02  |
| Muscle                 | 0.72 ± 0.06  | 1.15 ± 0.09  | 1.15 ± 0.15  | 1.00 ± 0.17  | 0.57 ± 0.16  |
| Bone                   | 2.79 ± 0.63  | 1.91 ± 0.30  | 1.79 ± 0.30  | 1.69 ± 0.16  | 1.19 ± 0.63  |
| Urine <sup>b</sup>     |              |              |              | 16.36 ± 2.40 | 38.27 ± 6.80 |
| Feces <sup>b</sup>     |              |              |              | 0.05 ± 0.07  | 1.76 ± 0.43  |

<sup>a</sup>Data represent the mean of %ID/g ± SD (n = 5).

<sup>b</sup>Data represent the mean of %ID ± SD (n = 5).

Table S6. Biodistribution of radioactivity at 3 h postinjection of [<sup>111</sup>In]In-DO3A*i*Bu-Bn-FGK-Fab and [<sup>111</sup>In]In-  
DOTA-Bn-SCN-Fab into SY tumor-bearing mice.<sup>a</sup>

|                        | [ <sup>111</sup> In]In-DO3A <i>i</i> Bu-Bn-FGK-Fab | [ <sup>111</sup> In]In-DOTA-Bn-SCN-Fab |
|------------------------|----------------------------------------------------|----------------------------------------|
| Blood                  | 5.13 ± 0.25                                        | 4.14 ± 0.40                            |
| Liver                  | 2.91 ± 0.31                                        | 7.86 ± 0.73                            |
| Spleen                 | 1.61 ± 0.19                                        | 4.86 ± 0.67                            |
| Kidney                 | 23.92 ± 4.65 <sup>c</sup>                          | 113.06 ± 10.68                         |
| Pancreas               | 1.10 ± 0.10                                        | 1.45 ± 0.22                            |
| Heart                  | 2.01 ± 0.30                                        | 2.68 ± 0.09                            |
| Lung                   | 3.92 ± 0.24                                        | 3.91 ± 0.55                            |
| Stomach <sup>b</sup>   | 0.70 ± 0.39                                        | 0.96 ± 0.68                            |
| Intestine <sup>b</sup> | 9.56 ± 2.62                                        | 5.87 ± 1.67                            |
| Muscle                 | 0.63 ± 0.06                                        | 0.93 ± 0.10                            |
| Bone                   | 0.96 ± 0.22                                        | 2.11 ± 0.49                            |
| Tumor                  | 8.04 ± 1.17                                        | 8.26 ± 2.23                            |

<sup>a</sup>Data represent the mean of %ID/g ± SD (n = 6).

<sup>b</sup>Data represent the mean of %ID ± SD (n = 6).

<sup>c</sup>*P* < 0.05 compared with [<sup>111</sup>In]In-DOTA-Bn-SCN-Fab. Significance in the kidney was determined by Student's *t*-test.

Table S7. Biodistribution of radioactivity after intravenous injection of [<sup>111</sup>In]In-DO3A*i*Bu-Bn-F into normal mice.<sup>a</sup>

|                        | 10 min       | 30 min       | 1 h          | 3 h          | 6 h          |
|------------------------|--------------|--------------|--------------|--------------|--------------|
| Blood                  | 1.16 ± 0.12  | 0.43 ± 0.14  | 0.06 ± 0.02  | 0.00 ± 0.00  | 0.00 ± 0.00  |
| Liver                  | 2.31 ± 0.04  | 1.74 ± 0.22  | 0.57 ± 0.14  | 0.55 ± 0.35  | 0.58 ± 0.16  |
| Spleen                 | 0.30 ± 0.05  | 0.24 ± 0.13  | 0.46 ± 0.52  | 0.01 ± 0.01  | 0.00 ± 0.00  |
| Kidney                 | 6.26 ± 1.97  | 6.47 ± 1.98  | 3.34 ± 2.33  | 0.43 ± 0.09  | 0.11 ± 0.04  |
| Pancreas               | 0.37 ± 0.05  | 0.29 ± 0.15  | 0.24 ± 0.29  | 0.02 ± 0.02  | 0.00 ± 0.00  |
| Heart                  | 0.57 ± 0.23  | 0.48 ± 0.42  | 0.10 ± 0.05  | 0.00 ± 0.01  | 0.00 ± 0.00  |
| Lung                   | 1.06 ± 0.14  | 0.50 ± 0.18  | 0.12 ± 0.03  | 0.05 ± 0.05  | 0.01 ± 0.00  |
| Stomach <sup>b</sup>   | 1.04 ± 0.19  | 0.29 ± 0.19  | 1.27 ± 0.65  | 0.87 ± 1.40  | 0.51 ± 0.89  |
| Intestine <sup>b</sup> | 12.91 ± 3.00 | 16.72 ± 2.31 | 22.94 ± 2.71 | 24.05 ± 3.41 | 26.59 ± 3.31 |
| Muscle                 | 0.33 ± 0.12  | 0.16 ± 0.08  | 0.06 ± 0.03  | 0.06 ± 0.08  | 0.00 ± 0.00  |
| Bone                   | 0.39 ± 0.05  | 0.24 ± 0.10  | 0.10 ± 0.02  | 0.03 ± 0.03  | 0.01 ± 0.02  |
| Urine <sup>b</sup>     |              |              |              |              | 56.66 ± 3.79 |
| Feces <sup>b</sup>     |              |              |              |              | 0.44 ± 0.23  |

<sup>a</sup>Data represent the mean of %ID/g ± SD (n = 4).

<sup>b</sup>Data represent the mean of %ID ± SD (n = 4).

Table S8. Biodistribution of radioactivity after intravenous injection of [<sup>111</sup>In]In-DOTA-Bn-F into normal mice.<sup>a</sup>

|                        | 10 min       | 30 min       | 1 h          | 3 h          | 6 h           |
|------------------------|--------------|--------------|--------------|--------------|---------------|
| Blood                  | 2.55 ± 0.14  | 0.61 ± 0.14  | 0.13 ± 0.12  | 0.01 ± 0.01  | 0.00 ± 0.00   |
| Liver                  | 4.22 ± 0.47  | 1.88 ± 0.14  | 0.81 ± 0.40  | 0.19 ± 0.10  | 0.23 ± 0.28   |
| Spleen                 | 0.56 ± 0.05  | 0.20 ± 0.07  | 0.07 ± 0.03  | 0.02 ± 0.02  | 0.01 ± 0.01   |
| Kidney                 | 16.12 ± 5.23 | 4.85 ± 2.86  | 5.30 ± 1.95  | 0.80 ± 0.23  | 0.46 ± 0.08   |
| Pancreas               | 0.71 ± 0.15  | 0.23 ± 0.06  | 0.35 ± 0.23  | 0.03 ± 0.02  | 0.00 ± 0.00   |
| Heart                  | 1.13 ± 0.31  | 0.25 ± 0.06  | 0.19 ± 0.10  | 0.03 ± 0.02  | 0.01 ± 0.01   |
| Lung                   | 1.99 ± 0.17  | 0.52 ± 0.16  | 0.19 ± 0.09  | 0.04 ± 0.02  | 0.01 ± 0.01   |
| Stomach <sup>b</sup>   | 0.49 ± 0.20  | 0.39 ± 0.13  | 0.35 ± 0.15  | 0.28 ± 0.06  | 0.02 ± 0.01   |
| Intestine <sup>b</sup> | 5.29 ± 0.99  | 10.81 ± 1.66 | 15.77 ± 4.11 | 17.65 ± 6.09 | 16.22 ± 3.65  |
| Muscle                 | 0.74 ± 0.07  | 0.22 ± 0.04  | 0.10 ± 0.07  | 0.01 ± 0.02  | 0.00 ± 0.00   |
| Bone                   | 0.68 ± 0.08  | 0.17 ± 0.04  | 0.07 ± 0.04  | 0.03 ± 0.03  | 0.01 ± 0.01   |
| Urine <sup>b</sup>     |              |              |              |              | 61.36 ± 12.42 |
| Feces <sup>b</sup>     |              |              |              |              | 0.75 ± 0.59   |

<sup>a</sup>Data represent the mean of %ID/g ± SD (n = 4).

<sup>b</sup>Data represent the mean of %ID ± SD (n = 4).

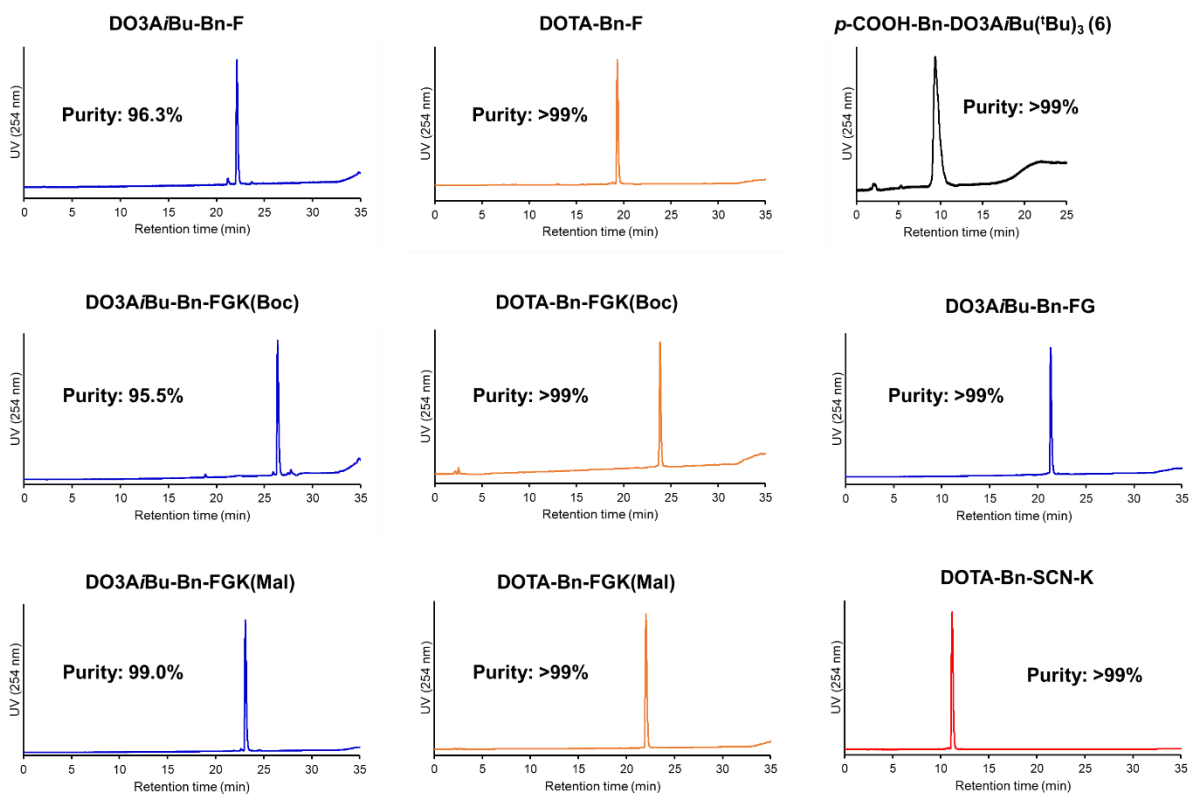

Figure S1. RP-HPLC analyses for purity check of key intermediate (6) and the precursors used for radiolabeling reactions. Chemical purities of all compounds were greater than 95%.

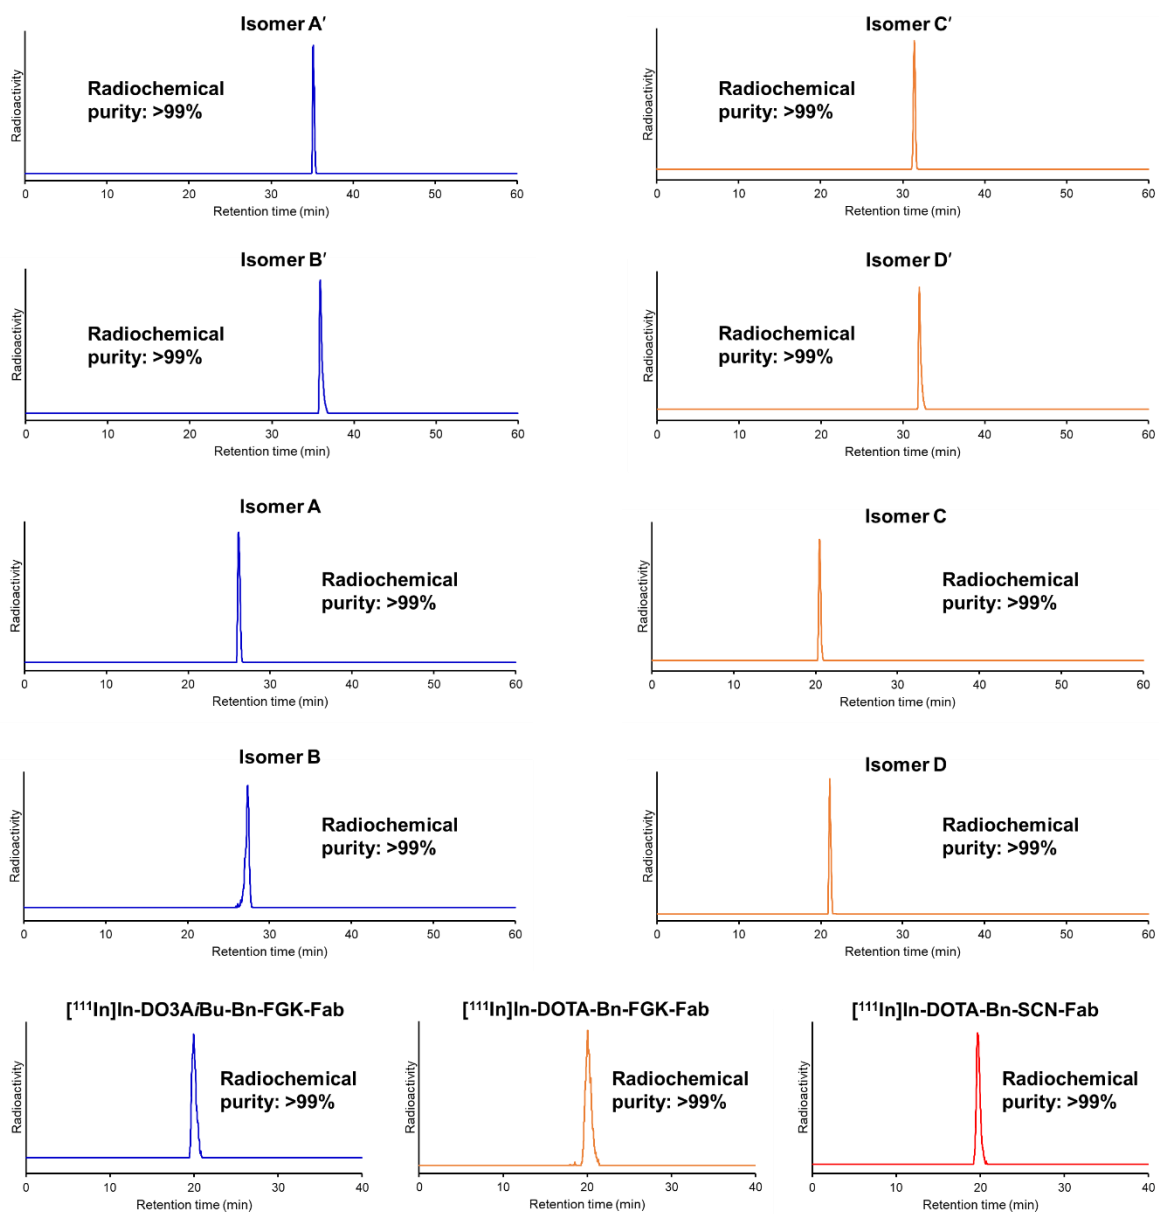

Figure S2. RP-HPLC and SE-HPLC analyses for purity check of  $^{111}\text{In}$ -labeled compounds. Radiochemical purities of all tested compounds determined by RP-HPLC or SE-HPLC were greater than 99%.



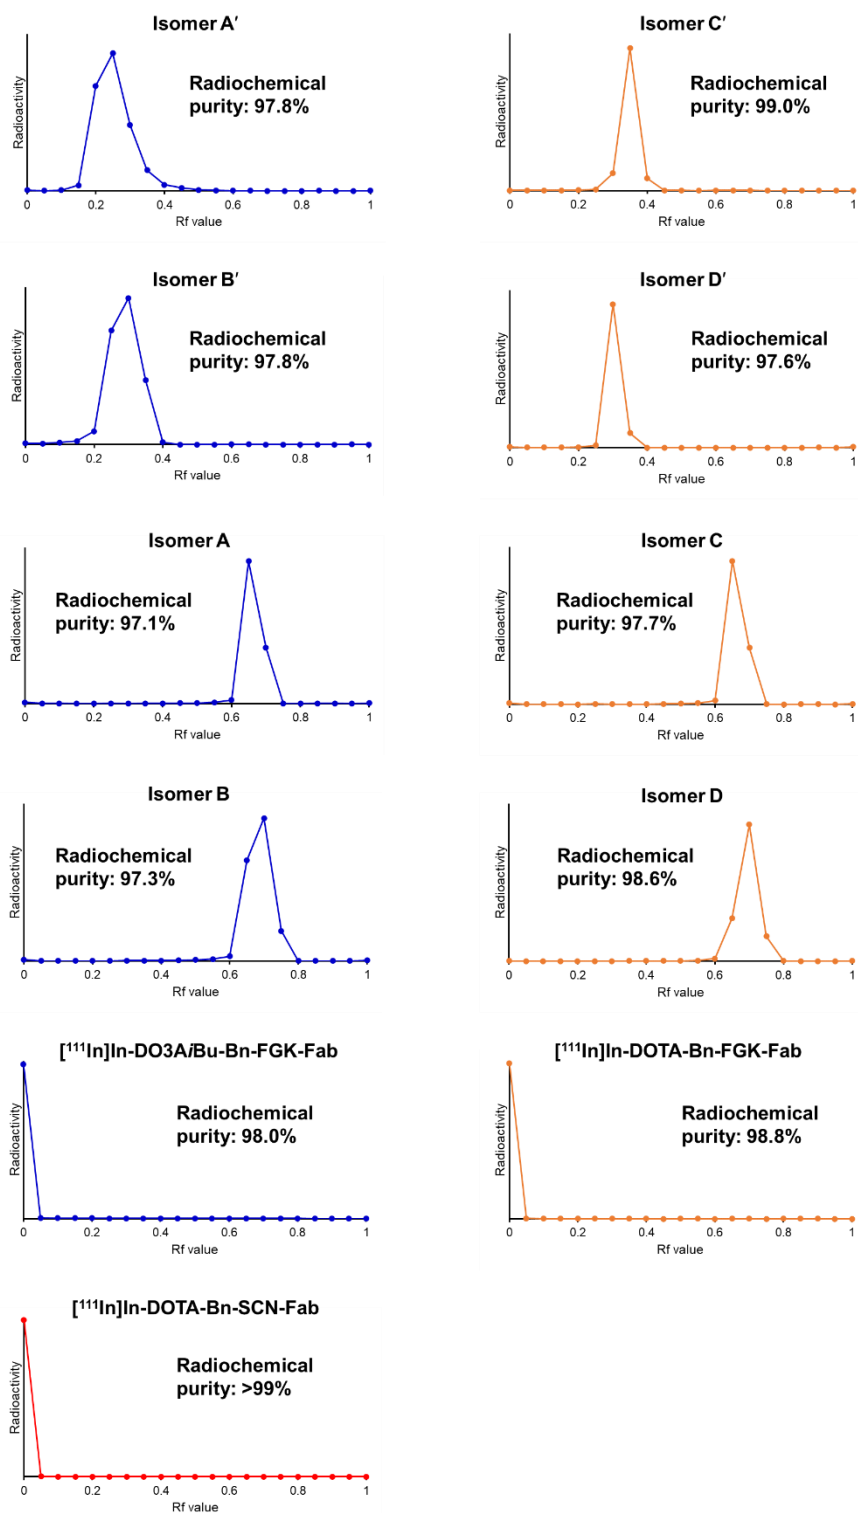

Figure S3. RP-TLC analyses for purity check of  $^{111}\text{In}$ -labeled compounds. Radiochemical purities of all tested compounds determined by RP-TLC were greater than 97%.

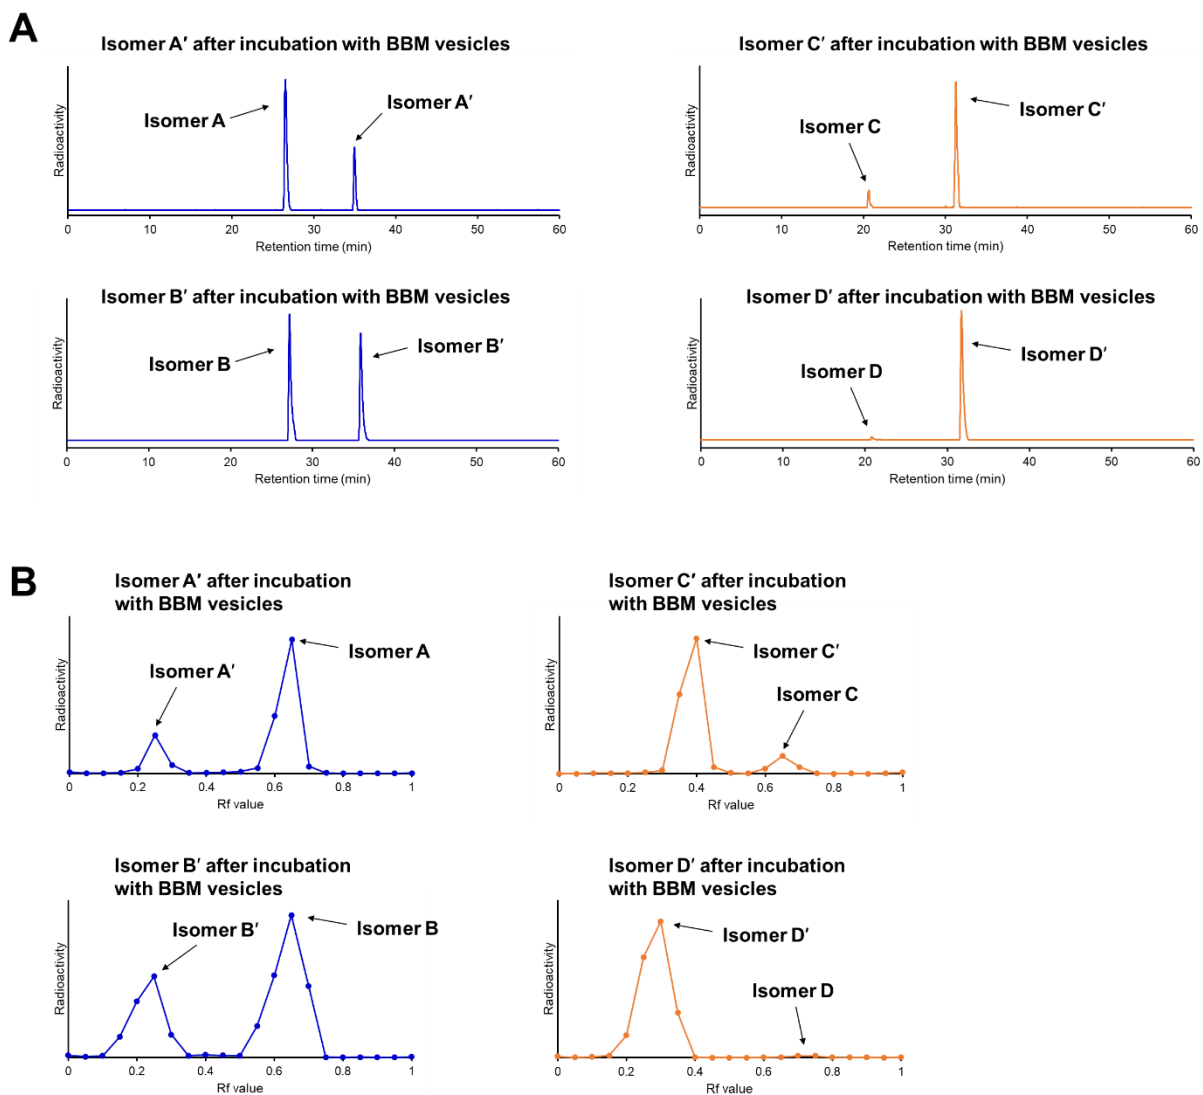

Figure S4. (A) RP-HPLC elution profiles of *in vitro* metabolic studies using  $^{111}\text{In}$ -labeled low-molecular-weight (LMW) substrates. (B) RP-TLC analyses of *in vitro* metabolic studies using  $^{111}\text{In}$ -labeled LMW substrates.

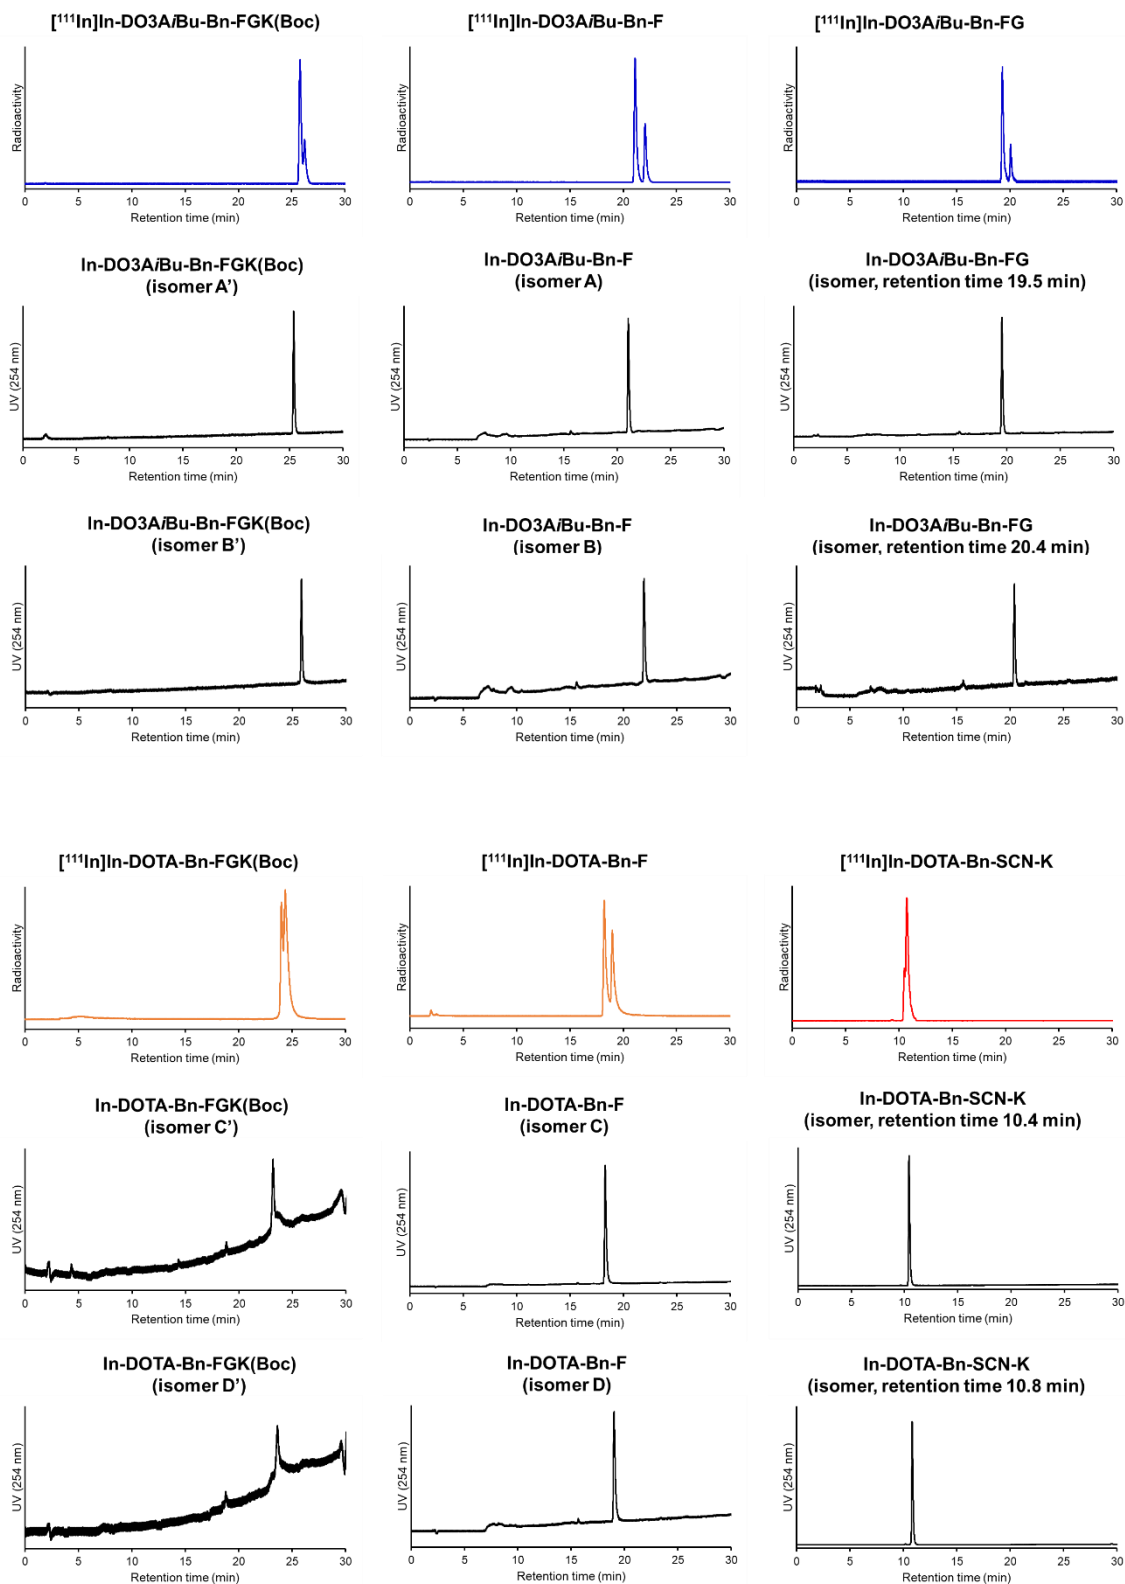

Figure S5. RP-HPLC analyses for characterization of  $^{111}\text{In}$ -labeled LMW compounds. All  $^{111}\text{In}$ -labeled compounds were characterized by the corresponding non-radioactive In-labeled compounds.

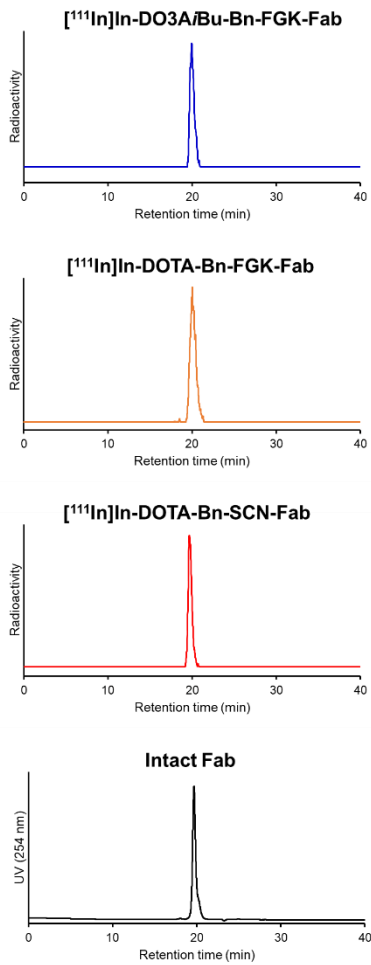

Figure S6. SE-HPLC analyses for characterization of <sup>111</sup>In-labeled Fabs. All <sup>111</sup>In-labeled compounds were eluted in the fraction of Fab.

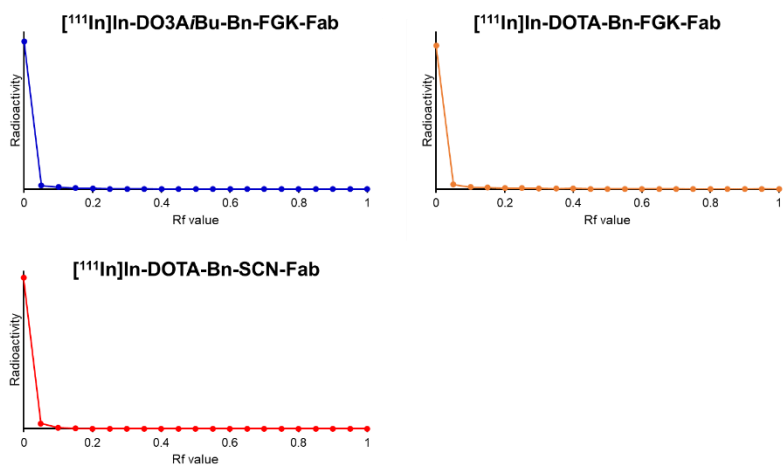

Figure S7. RP-TLC analyses of the *in vivo* plasma samples at 3 h postinjection of <sup>111</sup>In-labeled Fabs. All <sup>111</sup>In-labeled Fabs remained stable against *in vivo* plasma stability study (>95%). Radioactivity at the LMW fractions of [<sup>111</sup>In]In-DO3A/Bu-Bn-F and [<sup>111</sup>In]In-DOTA-Bn-F (Rf values: 0.6–0.8, Figure S3) were hardly observed for [<sup>111</sup>In]In-DO3A/Bu-Bn-FGK-Fab and [<sup>111</sup>In]In-DOTA-Bn-FGK-Fab, respectively (< 1%).

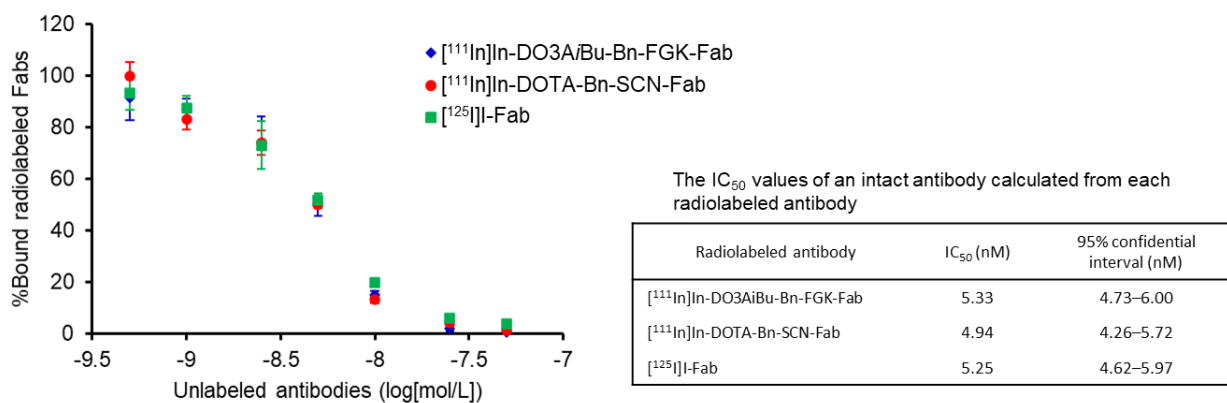

Figure S8. *In vitro* competitive inhibition assay of radiolabeled Fabs. The IC<sub>50</sub> values of an intact antibody determined from each radiolabeled Fabs were comparable.
